# Supplementary material
Source: PubMed Central journal article supplement (PMC3686339)

# **In Vitro Study of $\alpha$ -Synuclein Protofibrils by Cryo-EM Suggests a $\text{Cu}^{2+}$ -Dependent Aggregation Pathway**

Hangyu Zhang,<sup>†</sup> Amy Griggs,<sup>‡</sup> Jean-Christophe Rochet,<sup>‡</sup> and Lia A. Stanciu<sup>†§\*</sup>

<sup>†</sup>Weldon School of Biomedical Engineering, <sup>‡</sup>Department of Medicinal Chemistry and Molecular Pharmacology, and <sup>§</sup>School of Materials Engineering, Purdue University, West Lafayette, Indiana

Cryo-EM of  $\alpha$ -Synuclein Protofibrils

Zhang et al.

Submitted January 9, 2013, and accepted for publication April 23, 2013.

\*Correspondence: lstanciu@purdue.edu

## Supporting Material

### Figure Legends

**FIGURE S1 | Negative stain TEM images of heterogeneous structures of WT  $\alpha$ -synuclein.**  
A, Annular protofibrils. B, Spherical protofibrils.

**FIGURE S2 | A typical cryo-negative staining TEM image of heterogeneous protofibrils of WT  $\alpha$ -synuclein (A) and a typical cryo-EM image of WT  $\alpha$ -synuclein in absence of copper (B).**

**FIGURE S1**

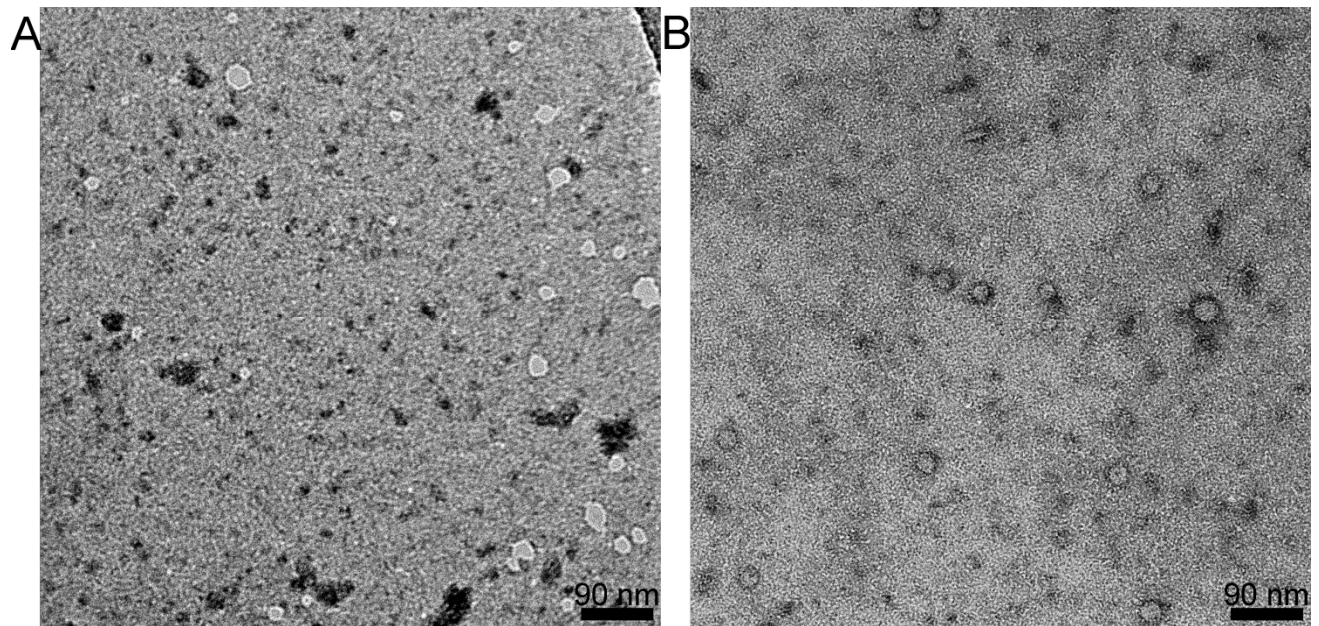

**FIGURE S2**

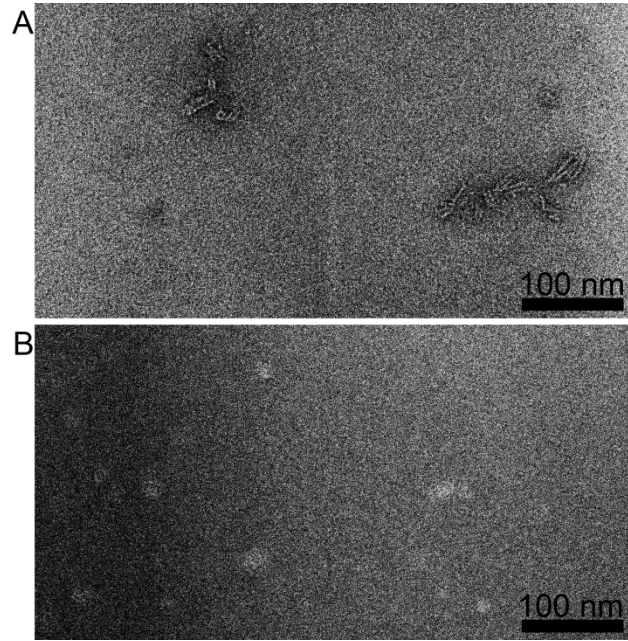

Supplement: mmc1.pdf [file mmc1.pdf]
